# Supplementary material for: Micro Light Flow Controller on a Programmable Waveguide Engine
Source: MDPI journal article supplement (doi:10.3390/mi13111990), 2022-11-16
Supplement: s1 [file s1]

# Optimized program in micro light flow controller

---

```
#####
% Micro Light Flow Controller on a Programmable Waveguide Engine
% Tao Chen 1,2,†, Zhangqi Dang 1,2,†, Zeyu Deng 2, Zhenming Ding 1,2, and Ziyang Zhang 2,*
% 1 College of Information Science and Electronic Engineering, Zhejiang University, Hangzhou 310027, China
% 2 Laboratory of Photonic Integration, School of Engineering, Westlake University, Hangzhou 310024, China
% * Correspondence: zhangziyang@westlake.edu.cn
% † These authors contributed equally to this work.
#####

clc;clear; % Clear screen and variable in workspace.

% Create folder#####
png_path = [pwd, '\png\']; % Png data path from camera.
mkdir(png_path);
bar_fig_path = [pwd, '\bar\']; % Bar fig path.
mkdir(bar_fig_path);
spot_path = [pwd, '\spot\']; % Clipping light spot path.
mkdir(spot_path);
filename_number_intensity=[pwd, '\number_intensity.txt']; % Create the number intensity txt file.
fid=fopen(filename_number_intensity, 'w+');
% Create folder#####

% Parameters setting#####
background = imread([pwd, '\background.png']); % Read the background image.
pause_time = 0.5; % Set the pause time between the applied current and image capture from IR camera, unit: second.
total_sweep_times = 300; % the maximum sweeping times.
objective_sum = 1.02e7; % Set the total output power (pixel counts) of the original 1x2 switch
objective_state_percent = [0.33,0.33,0.33]; % The target percents of the 3 outputs.
% Parameters setup#####

% MCU-based current source setup #####
% Set the switch sate of the channel in current source.[0: power off;1: power on]
m = modbus('serialrtu', 'COM3', 'Timeout', 20); % Connect with the current source by serial cable through modbus protocol.
CH1=0; % off
CH2=0; % off
CH3=1; % on, Electrode 3 in this work.
CH4=0; % off
CH5=1; % on, Electrode 4 in this work.
CH6=0; % off
CH7=0; % off
CH8=0; % off
CH9=0; % off
CH10=0; % off
CH11=0; % off
CH12=1; % on, Electrode 2 in this work.
CH13=0; % off
CH14=1; % on, Electrode 1 in this work.
CH15=0; % off
```

# Optimized program in micro light flow controller

---

```
CH16=0; % off

CH_switch=[CH1,CH2,CH3,CH4,CH5,CH6,CH7,CH8,CH9,CH10,CH11,CH12,CH13,CH14,CH15,CH16]; % Create the switch state vector.
write(m,'holdingregs',1,CH_switch); % Write the switch state vector into the MCU register to make it effect.
% Write(port name of the register,'holdingregs',start_address,switch_state_vector)
% MCU-based current source setup #####

% CCD camera initialization
try
    imagreset; % Image acquisition toolbox module initialization.
    vid = videoinput('gige', 1, 'Mono16'); % Connect the CCD camera through the ethernet cable by GigE vision protocol.
    src = getselectedsource(vid); % Get the camera.
    src.PacketDelay=70000; % Set the packet delay.
    src.PacketSize =1486; % Set the packet size.
    imagmex('feature', '-gigeDisablePacketResend', true); % Blank the Warnings.
    preview(vid); % Preview the camera data.
catch
    % If the camera has been activated, skip this process.
end

% The optimization process #####
sweep_number = 0; % Set the initial sweep number.
data_current_config_all = []; % Create the current config matrix.
tic
while sweep_number <= total_sweep_times % start the optimization process
    data_all =[];
    initial_current = round(double(rand(1,16)*9000)); % Set the initial current configuration, unit:  $\mu\text{A}$ 
    % initial_current = [0 0 x 0 x 0 0 0 0 0 0 0 x 0 x 0 0];
    % or set the specifc current value

    sweep_number = sweep_number +1; % Or set the sweeping number iteration.

    if sweep_number == 1 % if sweep_number is 1, the output current is the initial current.
        output_current = initial_current;
    end

    % Write the channel current config into the register.
    write(m,'holdingregs',17,output_current);
    % Write(port name of the register,'holdingregs',start_address,output_current_vector).

    % if sweep_number > 1
    % Read the switch state and current config in the register and save on the disk.
    data_read = read(m,'holdingregs',1,32);

    pause (pause_time) % The extra pause time for the data process and thermal equilibrium.

    try %
        img=getsnapshot (vid); % Capture the image in the CCD.
        name_png = [png_path,num2str(sweep_number),'.png']; % Set the serial number of the png
```

# Optimized program in micro light flow controller

---

```
document.
imwrite(img,name_png); % Save the image in png format.

catch % Self-recovery for the CCD camera if the CCD is disconnected or crash
% Reinitialize the IR camera #####
imaqreset; % Reset imaqttools
vid = videoinput('gige', 1, 'Mono16');
src = getselectedsource(vid);
src.PacketDelay=PacketDelay;
src.PacketSize = 1486;
preview(vid)
% Reinitialize the IR camera #####

img=getsnapshot (vid); % Capture the image in the CCD
name_png = [png_path,num2str(sweep_number),'.png']; % Set the serial number of the png
document.
imwrite(img,name_png); % Save the image in png format.
end

%*****Captured image process
% Parameters setting.
% Set the middle x and y axis of the 3 outputs, which is recognized in advance.
x_mid = [306,304,302];
y_mid = [134,322,511];
% Set the size of the spot.
size_x = 40;
size_y = 40;

start = img; % Read the captured image.
img_process = start - background; % The process image data is removed the background
information.

% The following process is to clip the light spot from the captured image.
location = 0; % subplot number
figure(1)
port_intensity_data = []; % Save the calcuated power information of the 3 output
ports.

for q=1:1:3 % q is the output port number.
    x_min = floor(x_mid (1,q) - size_x/2);
    x_max = floor(x_mid (1,q) + size_x/2);
    y_min = floor(y_mid (1,q) - size_y/2);
    y_max = floor(y_mid (1,q) + size_y/2);
    port_region = img_process (x_min:x_max,y_min:y_max); % Save the cropped light spot
data.
    intensity_port = sum (sum (port_region)); % The intensity information by summing
up the pixel count.
    port_intensity_data = [port_intensity_data; q intensity_port]; % Save the
intensity data.
    location = location+1;
    % Plot the subplot figure of the information.
    subplot(1,3,location)
    imshow(port_region);
    caxis([0,20000])
end
```

```
% Save the cropped spot figure.
spot_name = [spot_path,num2str(sweep_number),'_spot.png'];
saveas(figure(2),spot_name);

% Convert the output intensity into the percent of objective sum.
port_only_intensity_data = port_intensity_data(:,2)';
port_only_intensity_data_percent = port_only_intensity_data/objective_sum;

%*****

% Write the parameter data into txt document.
data_all = [sweep_number, data_read, port_only_intensity_data,
port_only_intensity_data_percent];
[m_data,n_data] = size (data_all);
for print_number = 1:1:n_data+1
if print_number <=n_data
fprintf(fid,'%f ' , data_all(1,print_number));
end
if print_number ==n_data+1
fprintf(fid,'\n ');
end
end

% Real-Time judgement.
actual_state = port_intensity_data(:,2)'; % The absolute value of the output lights.
actual_state_percent = port_only_intensity_data_percent; % The percent value of the
output lights.

% Caculate the Cost Function (CF).
diff_1 = 1-abs(objective_state_percent(1)-actual_state_percent(1))/
(objective_state_percent(1)+actual_state_percent(1));
diff_2 = 1-abs(objective_state_percent(2)-actual_state_percent(2))/
(objective_state_percent(2)+actual_state_percent(2));
diff_3 = 1-abs(objective_state_percent(3)-actual_state_percent(3))/
(objective_state_percent(3)+actual_state_percent(3));
sum_actual_state_percent = sum (actual_state_percent);
sum_objective_state_percent = sum (objective_state_percent);
cost_function = objective_state_percent(1)/sum_objective_state_percent*diff_1+...
objective_state_percent(2)/sum_objective_state_percent*diff_2+...
objective_state_percent(3)/sum_objective_state_percent*diff_3;

% Establish the data library for the following enquiry.
data_current_config_all = [data_current_config_all;sweep_number output_current,
cost_function];

if sweep_number == 1 % If the sweep_number == 1, the output_current is the best
current config.
best_current_config = output_current;
rand_NP_1 = 2*rand(1,16)-1; % Random fucntion.
output_current = best_current_config + round(double(rand_NP_1*300)); % Adjustment
level 2.
end % if sweep_number == 1

if sweep_number > 1 %If the sweep_number > 1, compare the cost function.
```

# Optimized program in micro light flow controller

---

```
last_cost_function = data_current_config_all(sweep_number-1, 18);

if sum_objective_state_percent*0.80 <= sum_actual_state_percent ...
    && sum_actual_state_percent <= sum_objective_state_percent*1.20 ...% Only
the sum actual intensity is in the setting ranging.
    && cost_function >= 0.8 % and the cost function is >= 0.8, the minor
adjusting is applying.

if (cost_function - last_cost_function) <= 0.02 % Selective retention.

best_current_config = data_current_config_all(sweep_number-1,2:17);
output_current = round(best_current_config+ round(double(rand_NP_1*300)));
else
best_current_config = data_current_config_all(sweep_number,2:17);
output_current = round(best_current_config+ round(double(rand_NP_1*300)));
end % minor adjusting end

else % the sum actual intensity is not in the setting ranging.
output_current = round(double(rand(1,16)*9000)); % producing the new random
current.
end % if sum_actual_state_percent >= 0.91

end % if sweep number > 1

% if the cost_function is >= 0.9, the optimization is completed.
if cost_function >= 0.9
    break
end

end % while end

data_all_proces = load ('number_intensity.txt'); % Save data.
xlswrite('number_intensity.xlsx',data_all_proces); % Save data.
write(m,'holdingregs',1,zeros(1,32)); % Clear all the registers.
toc
```
